# Supplementary material
Source: MDPI journal article supplement (https://www.mdpi.com/2673-7167/2/2/8)
Supplement: s1 [file s1]

Supplementary Material for:

# Assignment of the Vibrational Spectra of Diiron Nonacarbonyl, $\text{Fe}_2(\text{CO})_9$

Stewart F. Parker

ISIS Neutron and Muon Facility, STFC Rutherford Appleton Laboratory, Chilton OX11 0QX, UK;  
stewart.parker@stfc.ac.uk

**Keywords:** diiron nonacarbonyl; inelastic neutron scattering spectroscopy; infrared spectroscopy;  
Raman spectroscopy; density functional theory

---

|                                                                                                                                                                               |    |
|-------------------------------------------------------------------------------------------------------------------------------------------------------------------------------|----|
| <b>Figure S1.</b> The selection rules and mode numbering for $\text{Fe}_2(\text{CO})_9$ .                                                                                     | S2 |
| <b>Table S1.</b> Comparison of the observed and calculated geometries for the isolated molecule (Gaussian) and periodic calculations (CASTEP) of $\text{Fe}_2(\text{CO})_9$ . | S3 |
| <b>Table S2.</b> Transition energies, infrared intensities and assignments for $\text{Fe}_2(\text{CO})_9$ from a periodic-DFT (CASTEP) calculation.                           | S4 |
| <b>References.</b>                                                                                                                                                            | S7 |

TABLE 1.—SELECTION RULES FOR  $\text{Fe}_2(\text{CO})_9$ 

| $C_{6h}^2$             | factor-group analysis <sup>a</sup> |       |          |          |       |       |          |          |
|------------------------|------------------------------------|-------|----------|----------|-------|-------|----------|----------|
|                        | $A_g$                              | $B_g$ | $E_{1g}$ | $E_{2g}$ | $A_u$ | $B_u$ | $E_{1u}$ | $E_{2u}$ |
| $T_A$                  |                                    |       |          |          | 1     | 0     | 1        | 0        |
| $T$                    | 0                                  | 1     | 0        | 1        |       |       |          |          |
| $R$                    | 1                                  | 0     | 1        | 0        | 0     | 1     | 0        | 1        |
| $\Gamma_{\text{vib.}}$ | 10                                 | 8     | 8        | 10       | 8     | 10    | 10       | 8        |
| $\nu(\text{CO})_t$     | 1                                  | 1     | 1        | 1        | 1     | 1     | 1        | 1        |
| $\nu(\text{CO})_b$     | 1                                  | 0     | 0        | 1        | 0     | 1     | 1        | 0        |
| activities             | Raman                              |       | Raman    | Raman    | i.r.  |       | i.r.     |          |

$T_A$  = acoustic modes,  $T$  = optic branch translatory modes,  $R$  = libratory modes,  $\Gamma_{\text{vib.}}$  = internal vibrational modes of two coupled molecules. t = terminal, b = bridging.

correlations

molecule,  $D_{3h}$   $\longrightarrow$  site,  $C_{3h}$   $\xrightarrow{x^2}$  crystal,  $C_{6h}^2$

$7A'_1$  (Raman)  $\longrightarrow$   $10A'$  (Raman)  $10(A_g + B_u)$

$3A'_2$   $\longrightarrow$   $10A'$  (Raman)  $10(A_g + B_u)$

$10E'$  (Raman, i.r.)  $10E'$  (Raman, i.r.)  $10(E_{2g} + E_{1u})$

$2A''_1$   $\longrightarrow$   $8A''$  (i.r.)  $8(B_g + A_u)$

$6A''_2$  (i.r.)  $\longrightarrow$   $8A''$  (i.r.)  $8(B_g + A_u)$

$8E''$  (Raman)  $8E''$  (Raman)  $8(E_{1g} + E_{2u})$

<sup>a</sup> Based upon  $P63/m \equiv C_{6h}^2$ ,  $z = 2$ ,

TABLE 2.—MODE NUMBERING FOR  $\text{Fe}_2(\text{CO})_9$ 

| $D_{3h}$                                     | $A'_1$  | $A'_2$     | $E'$          | $A''_1$    | $A''_2$    | $E''$         |
|----------------------------------------------|---------|------------|---------------|------------|------------|---------------|
| $\nu(\text{CO})_t$                           | $\nu_1$ |            | $\nu_{11}$    |            | $\nu_{23}$ | $\nu_{29}$    |
| $\nu(\text{CO})_b$                           | $\nu_2$ |            | $\nu_{12}$    |            |            |               |
| $\delta(\text{FeCO})_t$                      | $\nu_3$ | $\nu_8$    | $\nu_{13,14}$ | $\nu_{21}$ | $\nu_{24}$ | $\nu_{30,31}$ |
| $\delta(\text{FeCO})_b$                      |         | $\nu_9$    | $\nu_{15}$    |            | $\nu_{25}$ | $\nu_{32}$    |
| $\nu(\text{Fe—C})_t$                         | $\nu_4$ |            | $\nu_{16}$    |            | $\nu_{26}$ | $\nu_{33}$    |
| $\nu(\text{Fe—C})_b$ <sup>a</sup>            | $\nu_5$ |            | $\nu_{17}$    |            |            |               |
| $\delta(\text{CFeC})_t$                      | $\nu_6$ | $\nu_{10}$ | $\nu_{18,19}$ | $\nu_{22}$ | $\nu_{27}$ | $\nu_{34,35}$ |
| $\Delta(\text{Fe}_2\text{C}_3)$ <sup>a</sup> | $\nu_7$ |            | $\nu_{20}$    |            | $\nu_{28}$ | $\nu_{36}$    |
| total                                        | 7       | 3          | 10            | 2          | 6          | 8             |

<sup>a</sup> These two rows together describe the modes of the  $\text{Fe}_2\text{C}_3$  cluster. The distinction between  $\nu(\text{Fe—C})_b$  and  $\Delta(\text{Fe}_2\text{C}_3)$  modes is for accounting purposes only and is unlikely to be an accurate reflection of the truth.

**Figure S1.** The selection rules and mode numbering for  $\text{Fe}_2(\text{CO})_9$ . Note that the correlations (middle part) are for the internal modes only, the lattice modes are not included. Reproduced from [1] with permission of the Royal Society of Chemistry.

**Table S1.** Comparison of the observed and calculated geometries for the isolated molecule (Gaussian) and periodic calculations (CASTEP) of Fe<sub>2</sub>(CO)<sub>9</sub>.

|                            | Expt. [2] | Jang et al. [3] <sup>a</sup><br>BP86/DZP | Jang et al. [3] <sup>a</sup><br>B3LYP/DZP | This work <sup>b</sup><br>B3LYP/aug-ccVTZ | This work<br>CASTEP |
|----------------------------|-----------|------------------------------------------|-------------------------------------------|-------------------------------------------|---------------------|
| Distances / Å <sup>d</sup> |           |                                          |                                           |                                           |                     |
| Fe–Fe'                     | 2.523     | 2.5188                                   | 2.5253                                    | 2.5227                                    | 2.5071              |
| Fe–C(1)                    | 1.835     | 1.8186                                   | 1.8288                                    | 1.8286                                    | 1.8026              |
| Fe–C(2)                    | 2.013     | 2.066                                    | 2.0076                                    | 1.9998                                    | 1.9897              |
| C(1)–O(1)                  | 1.127     | 1.1664                                   | 1.1516                                    | 1.1382                                    | 1.1540              |
| C(2)–O(2)                  | 1.160     | 1.1862                                   | 1.1756                                    | 1.1634                                    | 1.1772              |
| Angles / °                 |           |                                          |                                           |                                           |                     |
| Fe–Fe'–C(1)                | 120.9     |                                          |                                           | 120.5                                     | 121.3               |
| Fe'–C(2)–Fe                | 77.6      |                                          |                                           | 78.2                                      | 78.1                |
| C(1)–Fe–C(1')              | 96.1      | 95.9                                     | 96.4                                      | 96.5                                      | 95.5                |
| C(2)–Fe–C(2')              | 84.9      |                                          |                                           | 84.4                                      | 84.5                |
| Fe–C(1)–O(1)               | 177.1     | 176.9                                    | 177.5                                     | 177.6                                     | 176.7               |
| Fe–C(2)–O(2)               | 141.2     |                                          |                                           | 140.9                                     | 140.9               |

<sup>a</sup>  $D_{3h}$  symmetry imposed on the molecule (isolated molecule calculation). <sup>b</sup>  $C_{3h}$  symmetry imposed on the molecule (isolated molecule calculation). <sup>c</sup> Periodic calculation of the complete unit cell. <sup>d</sup> Primes indicate symmetry related atoms. C(1) and C(2) are terminal and bridging carbons respectively. O(1) and O(2) are the oxygen atoms attached to C(1) and C(2) respectively.

**Table S2.** Transition energies, infrared intensities and assignments for Fe<sub>2</sub>(CO)<sub>9</sub> from a periodic-DFT (CASTEP) calculation.

| Transition energy/cm <sup>-1</sup> | Average <sup>a</sup> /cm <sup>-1</sup> | Range <sup>b</sup> /cm <sup>-1</sup> | Infrared intensity/km mol <sup>-1</sup> | IR active? | Raman active? | C <sub>3h</sub> | D <sub>3h</sub> | Assignment           |
|------------------------------------|----------------------------------------|--------------------------------------|-----------------------------------------|------------|---------------|-----------------|-----------------|----------------------|
| 0                                  |                                        |                                      | 0.00                                    | N          | N             | E1u             | E'              | Acoustic translation |
| 0                                  |                                        |                                      | 0.00                                    | N          | N             | E1u             | E'              | Acoustic translation |
| 0                                  |                                        |                                      | 0.00                                    | N          | N             | Au              | A2''            | Acoustic translation |
| 30                                 |                                        |                                      | 0.00                                    | N          | Y             | E2g             | E'              | Optic translation    |
| 30                                 |                                        |                                      | 0.00                                    | N          | Y             | E2g             | E'              | Optic translation    |
| 51                                 |                                        |                                      | 0.00                                    | N          | N             | Bg              | A2''            | Optic translation    |
| 65                                 |                                        |                                      | 0.00                                    | N          | N             | E2u             | E''             | Libration            |
| 65                                 |                                        |                                      | 0.00                                    | N          | N             | E2u             | E''             | Libration            |
| 70                                 |                                        |                                      | 0.00                                    | N          | Y             | E1g             | E''             | Libration            |
| 70                                 |                                        |                                      | 0.00                                    | N          | Y             | E1g             | E''             | Libration            |
| 77                                 |                                        |                                      | 0.00                                    | N          | N             | Bu              | A2'             | Libration            |
| 86                                 | 86                                     | 1                                    | 0.00                                    | N          | Y             | E2g             | E'              | v20                  |
| 86                                 |                                        |                                      | 0.00                                    | N          | Y             | E2g             | E'              | v20                  |
| 86                                 |                                        |                                      | 0.29                                    | Y          | N             | E1u             | E'              | v20                  |
| 86                                 |                                        |                                      | 0.29                                    | Y          | N             | E1u             | E'              | v20                  |
| 87                                 |                                        |                                      | 0.00                                    | N          | Y             | Ag              | A2'             | Libration            |
| 87                                 | 93                                     | 11                                   | 0.54                                    | Y          | N             | Au              | A1''            | v22                  |
| 88                                 | 90                                     | 4                                    | 0.00                                    | N          | Y             | E1g             | E''             | v36                  |
| 88                                 |                                        |                                      | 0.00                                    | N          | Y             | E1g             | E''             | v36                  |
| 92                                 |                                        |                                      | 0.00                                    | N          | N             | E2u             | E''             | v36                  |
| 92                                 |                                        |                                      | 0.00                                    | N          | N             | E2u             | E''             | v36                  |
| 99                                 |                                        |                                      | 0.00                                    | N          | N             | Bg              | A1''            | v22                  |
| 105                                | 106                                    | 2                                    | 0.92                                    | Y          | N             | E1u             | E'              | v19                  |
| 105                                |                                        |                                      | 0.92                                    | Y          | N             | E1u             | E'              | v19                  |
| 107                                |                                        |                                      | 0.00                                    | N          | Y             | E2g             | E'              | v19                  |
| 107                                |                                        |                                      | 0.00                                    | N          | Y             | E2g             | E'              | v19                  |
| 117                                | 123                                    | 11                                   | 0.00                                    | N          | N             | Bu              | A1'             | v7                   |
| 118                                | 119                                    |                                      | 0.00                                    | N          | N             | E2u             | E''             | v35                  |
| 118                                |                                        |                                      | 0.00                                    | N          | N             | E2u             | E''             | v35                  |
| 119                                |                                        |                                      | 0.00                                    | N          | Y             | E1g             | E''             | v35                  |
| 119                                |                                        |                                      | 0.00                                    | N          | Y             | E1g             | E''             | v35                  |
| 128                                |                                        |                                      | 0.00                                    | N          | Y             | Ag              | A1'             | v7                   |
| 129                                | 135                                    | 12                                   | 0.00                                    | N          | N             | Bu              | A2'             | v10                  |
| 131                                | 133                                    | 5                                    | 0.00                                    | N          | Y             | E2g             | E'              | v18                  |
| 131                                |                                        |                                      | 0.00                                    | N          | Y             | E2g             | E'              | v18                  |
| 135                                |                                        |                                      | 3.82                                    | Y          | N             | E1u             | E'              | v18                  |
| 135                                |                                        |                                      | 3.82                                    | Y          | N             | E1u             | E'              | v18                  |
| 138                                | 141                                    | 7                                    | 5.84                                    | Y          | N             | Au              | A2''            | v28                  |
| 141                                |                                        |                                      | 0.00                                    | N          | Y             | Ag              | A2'             | v10                  |
| 145                                |                                        |                                      | 0.00                                    | N          | N             | Bg              | A2''            | v28                  |
| 172                                | 172                                    | 0                                    | 0.00                                    | N          | Y             | E1g             | E''             | v34                  |
| 172                                |                                        |                                      | 0.00                                    | N          | Y             | E1g             | E''             | v34                  |
| 172                                |                                        |                                      | 0.00                                    | N          | N             | E2u             | E''             | v34                  |
| 172                                |                                        |                                      | 0.00                                    | N          | N             | E2u             | E''             | v34                  |
| 250                                | 251                                    | 2                                    | 15.94                                   | Y          | N             | Au              | A2''            | v27                  |
| 252                                |                                        |                                      | 0.00                                    | N          | N             | Bg              | A2''            | v27                  |
| 269                                | 269                                    | 1                                    | 0.00                                    | N          | N             | Bu              | A1'             | v6                   |
| 270                                |                                        |                                      | 0.00                                    | N          | Y             | Ag              | A1'             | v6                   |
| 325                                | 325                                    | 0                                    | 0.00                                    | N          | Y             | E1g             | E''             | v33                  |
| 325                                |                                        |                                      | 0.00                                    | N          | Y             | E1g             | E''             | v33                  |
| 326                                |                                        |                                      | 0.00                                    | N          | N             | E2u             | E''             | v33                  |
| 326                                |                                        |                                      | 0.00                                    | N          | N             | E2u             | E''             | v33                  |
| 383                                | 383                                    | 1                                    | 0.00                                    | N          | N             | Bu              | A2'             | v9                   |
| 383                                |                                        |                                      | 0.00                                    | N          | Y             | Ag              | A2'             | v9                   |
| 396                                | 396                                    | 0                                    | 10.41                                   | Y          | N             | E1u             | E'              | v17                  |
| 396                                |                                        |                                      | 10.41                                   | Y          | N             | E1u             | E'              | v17                  |
| 396                                |                                        |                                      | 0.00                                    | N          | Y             | E2g             | E'              | v17                  |
| 396                                |                                        |                                      | 0.00                                    | N          | Y             | E2g             | E'              | v17                  |
| 420                                | 420                                    | 0                                    | 0.00                                    | N          | N             | Bu              | A1'             | v5                   |

|      |      |    |         |   |   |     |      |     |
|------|------|----|---------|---|---|-----|------|-----|
| 420  |      |    | 0.00    | N | Y | Ag  | A1'  | v5  |
| 431  | 432  | 1  | 0.05    | Y | N | Au  | A1'' | v21 |
| 432  |      |    | 0.00    | N | N | Bg  | A1'' | v21 |
| 444  | 444  | 1  | 31.93   | Y | N | E1u | E'   | v16 |
| 444  |      |    | 31.93   | Y | N | E1u | E'   | v16 |
| 445  |      |    | 0.00    | N | Y | E2g | E'   | v16 |
| 445  |      |    | 0.00    | N | Y | E2g | E'   | v16 |
| 466  | 467  | 1  | 0.00    | N | N | E2u | E''  | v32 |
| 466  |      |    | 0.00    | N | N | E2u | E''  | v32 |
| 468  |      |    | 0.00    | N | Y | E1g | E''  | v32 |
| 468  |      |    | 0.00    | N | Y | E1g | E''  | v32 |
| 473  | 475  | 2  | 45.50   | Y | N | Au  | A2'' | v26 |
| 475  |      |    | 0.00    | N | N | Bg  | A2'' | v26 |
| 475  | 475  | 0  | 0.00    | N | Y | E2g | E'   | v15 |
| 475  |      |    | 0.00    | N | Y | E2g | E'   | v15 |
| 475  |      |    | 91.11   | Y | N | E1u | E'   | v15 |
| 475  |      |    | 91.11   | Y | N | E1u | E'   | v15 |
| 495  | 495  | 0  | 0.00    | N | N | Bu  | A1'  | v4  |
| 495  |      |    | 0.00    | N | Y | Ag  | A1'  | v4  |
| 501  | 502  | 1  | 0.00    | N | Y | E1g | E''  | v31 |
| 501  |      |    | 0.00    | N | Y | E1g | E''  | v31 |
| 502  |      |    | 0.00    | N | N | E2u | E''  | v31 |
| 502  |      |    | 0.00    | N | N | E2u | E''  | v31 |
| 519  | 519  | 0  | 0.00    | N | N | Bu  | A2'  | v8  |
| 519  |      |    | 0.00    | N | Y | Ag  | A2'  | v8  |
| 541  | 541  | 0  | 0.00    | N | Y | E2g | E'   | v14 |
| 541  |      |    | 0.00    | N | Y | E2g | E'   | v14 |
| 541  |      |    | 8.74    | Y | N | E1u | E'   | v14 |
| 541  |      |    | 8.74    | Y | N | E1u | E'   | v14 |
| 579  | 598  | 9  | 810.94  | Y | N | Au  | A2'' | v25 |
| 588  |      |    | 0.00    | N | N | Bg  | A2'' | v25 |
| 611  | 612  | 1  | 0.00    | N | N | E2u | E''  | v30 |
| 611  |      |    | 0.00    | N | N | E2u | E''  | v30 |
| 612  |      |    | 0.00    | N | Y | E1g | E''  | v30 |
| 612  |      |    | 0.00    | N | Y | E1g | E''  | v30 |
| 625  | 626  | 1  | 1011.37 | Y | N | E1u | E'   | v13 |
| 625  |      |    | 1011.37 | Y | N | E1u | E'   | v13 |
| 626  |      |    | 0.00    | N | Y | E2g | E'   | v13 |
| 626  |      |    | 0.00    | N | Y | E2g | E'   | v13 |
| 643  | 643  | 1  | 0.00    | N | Y | Ag  | A1'  | v3  |
| 644  |      |    | 0.00    | N | N | Bu  | A1'  | v3  |
| 661  | 692  | 62 | 2749.55 | Y | N | Au  | A2'' | v24 |
| 723  |      |    | 0.00    | N | N | Bg  | A2'' | v24 |
| 1809 | 1809 | 0  | 5494.12 | Y | N | E1u | E'   | v12 |
| 1809 |      |    | 5494.12 | Y | N | E1u | E'   | v12 |
| 1809 |      |    | 0.00    | N | Y | E2g | E'   | v12 |
| 1809 |      |    | 0.00    | N | Y | E2g | E'   | v12 |
| 1875 | 1875 | 0  | 0.00    | N | Y | Ag  | A1'  | v2  |
| 1875 |      |    | 0.00    | N | N | Bu  | A1'  | v2  |
| 1976 | 1976 | 0  | 0.00    | N | N | E2u | E''  | v29 |
| 1976 |      |    | 0.00    | N | N | E2u | E''  | v29 |
| 1976 |      |    | 0.00    | N | Y | E1g | E''  | v29 |
| 1976 |      |    | 0.00    | N | Y | E1g | E''  | v29 |
| 1978 | 1978 | 0  | 4704.47 | Y | N | E1u | E'   | v11 |
| 1978 |      |    | 4704.47 | Y | N | E1u | E'   | v11 |
| 1979 |      |    | 0.00    | N | Y | E2g | E'   | v11 |
| 1979 |      |    | 0.00    | N | Y | E2g | E'   | v11 |
| 2017 | 2038 | 42 | 5808.27 | Y | N | Au  | A2'' | v23 |
| 2058 |      |    | 0.00    | N | N | Bg  | A2'' | v23 |
| 2074 | 2074 | 1  | 0.00    | N | Y | Ag  | A1'  | v1  |

<sup>a</sup> Average of the factor group components. <sup>b</sup> Difference between highest and lowest factor group components.

## References

1. Adams, D.M.; Taylor, I.D. Solid-state metal carbonyls Part 3.-An infrared study of  $\text{Fe}_2(\text{CO})_9$ , tri- $\mu$ -carbonyl(hexacarbonyl)di-iron(0). *J. Chem. Soc. Faraday Trans. 2*, **1982**, 78, 1551-1559 [doi: 10.1039/F29827801551].
2. Cotton, F.A.; Troup, J.M. Accurate determination of a classic structure in the metal carbonyl field: Nonacarbonyldi-iron. *J. Chem. Soc. Dalton* **1974**, 800-802 [doi: 10.1039/DT9740000800].
3. Jang, J. H.; Lee, J. G.; Lee, H.; Xie, Y.; Schaefer III, H. F. Molecular structures and vibrational frequencies of iron carbonyls:  $\text{Fe}(\text{CO})_5$ ,  $\text{Fe}_2(\text{CO})_9$  and  $\text{Fe}_3(\text{CO})_{12}$ . *J. Phys. Chem. A* **1998**, 102, 5298-5304 [doi: 10.1021/jp981356o].
